1 **Efficient rescue of a newly classified Ebinur lake orthobunyavirus**  
2 **with GFP reporter and its application in rapid antiviral screening**

3 Nanjie Ren<sup>1,2,#</sup>, Fei Wang<sup>1,#</sup>, Lu Zhao<sup>3</sup>, Shunlong Wang<sup>1,2</sup>, Guilin Zhang<sup>4</sup>, Jiaqi Li<sup>1,2</sup>,  
4 Bo Zhang<sup>1,2</sup>, Eric Bergeron<sup>5</sup>, Zhiming Yuan<sup>1,2,\*</sup>, Han Xia<sup>1,2,\*</sup>

5

6 1. Key Laboratory of Special Pathogens and Biosafety, Wuhan Institute of Virology,  
7 Chinese Academy of Sciences, Wuhan, Hubei, China

8 2. University of Chinese Academy of Sciences, Beijing, China

9 3. Institute of Biology, Westlake institute for Advanced Study, School of Life  
10 sciences, Westlake University, Zhejiang, China

11 4. Xinjiang Heribase Biotechnology CO., LTD., Urumqi, China

12 5. Viral Special Pathogens Branch, Division of High-Consequence Pathogens and  
13 Pathology, National Center for Emerging and Zoonotic Infectious Diseases, Centers  
14 for Disease Control and Prevention, Atlanta, United States

15

16 \*Corresponding authors: Zhiming Yuan (yzm@wh.iov.cn) and Han Xia  
17 (hanxia@wh.iov.cn)

18 # These authors contributed equally to this work.

19

20 **Abstract**

21 Orthobunyaviruses have been reported to cause severe diseases in humans or animals,  
22 posing a threat to human health and social economy. Ebinur lake virus (EBIV) is a  
23 newly classified orthobunyavirus, which needs further intensive study and therapies to  
24 cope with its potential infection risk to human and animals. Here, through the reverse  
25 genetics system, the recombinant EBIV of wild type (rEBIV/WT) and  
26 NP-conjugated-eGFP (rEBIV/eGFP/S) were rescued for the application of the rapid  
27 antiviral drug screening. The eGFP fluorescence signal of the rEBIV/eGFP/S was  
28 stable in the process of successive passage in BHK-21 cells (over 10 passages) and  
29 this recombinant virus could replicate in various cell lines. Compared to the wild type  
30 EBIV, the rEBIV/eGFP/S caused the smaller plaques and its peak titers were lower,  
31 suggesting attenuation due to the eGFP insertion. Through the high-content screening

32 (HCS) system, ribavirin showed an inhibitory effect on the rEBIV/eGFP/S with an  
33 EC<sub>50</sub> of 21.91  $\mu$ M, while favipiravir did not inhibit, even at high concentrations. In  
34 addition, five of ninety-six natural compounds had antiviral against EBIV. The robust  
35 reverse genetics system for EBIV will facilitate investigation into replication and  
36 assembly mechanisms and assist drug and vaccine development.

37

38 **Keyword:** *Orthobunyavirus*; Ebinur lake virus; reverse genetic system; reporter virus;  
39 high-content screening; antiviral drugs

40

## 41 **1 Introduction**

42 Emerging and re-emerging arboviruses pose a big threat to human and animal health  
43 worldwide (1). The genus *Orthobunyavirus* (family *Peribunyaviridae*) includes over  
44 18 serogroups is the largest genus in the order *Bunyavirales*, comprising over 170  
45 arboviruses which were mainly transmitted through mosquito vectors (2)(3). These  
46 negative-sense RNA viruses take their name from Bunyamwera virus (BUNV), which  
47 was originally isolated in 1943 from *Aedes* mosquitoes during an investigation of  
48 yellow fever in the Semliki Forest, Uganda (4). Some members of *Orthobunyavirus*  
49 can result in several disease syndromes in humans, including acute but self-limiting  
50 febrile illness (Oropouche virus (OROV)) (5), pediatric arboviral encephalitis (La  
51 Crosse virus (LACV)) (6) and haemorrhagic fever (Ngari virus (NRIV)) (7). Apart  
52 from human pathogens, orthobunyaviruses comprises some veterinary pathogens,  
53 such as Akabane virus (AKAV) and Schmallenberg virus (SBV), which both cause  
54 congenital malformations in ruminants (8)(9).

55 Orthobunyaviruses are tri-segmented negative-sense RNA viruses, comprising  
56 small (S), medium (M), and large (L) segments (4), named by the segment length. The  
57 *L* segment encodes the viral RNA-dependent RNA polymerase (RdRp), which  
58 involved in the genome replication. The *M* segment encodes two structural  
59 glycoproteins, Gn and Gc, and a non-structural protein (NSm). Gn and Gc are related  
60 to receptor binding and the fusion of the viral and endosomal membranes (10). The

61 NSm was suggested to function as a scaffold for virion assembly (11). The *S* segment  
62 encodes the nucleocapsid protein (N) and a non-structural protein (NSs) in  
63 overlapping open reading frames with the same direction. The N protein encapsidates  
64 both genomic and antigenomic RNA (but not viral mRNA) to form ribonucleoprotein  
65 (RNPs) complexes that are the templates for the viral RdRp (4)(12). The NSs protein  
66 is considered as the major virulence determinant of orthobunyaviruses by antagonizing  
67 host innate immune responses, including type I interferon responses (13)(14).

68 Reverse genetic systems are powerful and versatile molecular tools for the study of  
69 RNA viruses, which can be used to produce attenuated virus vaccine (15), probe viral  
70 replication and interactions with host innate immune responses (4). Since the BUNV  
71 was recovered from transfecting cells with just three plasmids that express full-length  
72 antigenome viral RNAs in 2004 (16), the infectious cDNA clones have been obtained  
73 for several orthobunyaviruses, such as SBV (17), LACV (18), AKBV (19) and Shuni  
74 virus (SHNV) (10). According to the previous researches, we can find that two  
75 transcription plasmids for the reverse systems have been developed: (1) transcription  
76 plasmids based on T7 promoter which could be recognized by T7 RNA polymerase;  
77 (2) transcription plasmids using mammalian RNA polymerase I promoters (4).  
78 Considering the efficiency of RNA polymerase I-driven system was lower than that of  
79 T7 RNA polymerase (19), the latter was chosen in our study.

80 Ebinur lake virus (EBIV) is isolated from *Culex modestus* mosquito pools in Ebinur  
81 lake region, Xinjiang in 2014 (20). Our previous work demonstrates that EBIV has  
82 the highest similarity with Germiston virus (GERV) (21), which belongs to risk group  
83 3 human pathogens. Remarkably, EBIV can cause acute lethal disease in adult mice  
84 (22), and the antibodies against EBIV are detected in local residents, which indicate  
85 that EBIV has a potential infection risk in animal and/or human (21). Hence, we use  
86 the reverse genetics system to rescue the recombinant EBIV of wild type (rEBIV/WT)  
87 and NP-conjugated-eGFP (rEBIV/eGFP/S). Furthermore, through the high-content  
88 screening (HCS) system, ribavirin and five natural compounds was found to have the  
89 antiviral effects against the recombinant EBIV.

## 91 **2 Methods and Materials**

### 92 **2.1 Cells, viruses and antibodies**

93 Baby hamster kidney cell (BHK-21), African green monkey kidney cells (Vero E6),  
94 human adrenal cortical carcinoma cells (SW13), and porcine kidney epithelial cells  
95 (PK15) were propagated in Dulbecco's modified Eagle's medium (DMEM, Gibco)  
96 supplemented with 10% fetal bovine serum (FBS, Gibco), 100 units/mL of penicillin  
97 and 100 µg/mL of streptomycin. BSR-T7 cell, a generous gift from Prof. Bo Zhang,  
98 which could express T7 RNA polymerase, were cultured in DMEM supplemented  
99 with 10% FBS and 1 mg/mL G418 (Beyotime). All mammalian cells were grown at  
100 37 °C under a 5% CO<sub>2</sub> atmosphere. The chicken hepatocellular carcinoma cell line  
101 (LMH) was maintained in Dulbecco's Modified Eagle Medium/Nutrient Mixture F-12  
102 (DME/F-12, HyClone) containing 10% FBS and 1% penicillin/streptomycin at 37 °C  
103 in 5% CO<sub>2</sub>. The *Aedes albopictus* mosquito cell (C6/36) was grown in Roswell Park  
104 Memorial Institute (RPMI) 1640 medium supplemented with 10% FBS and 1%  
105 penicillin/streptomycin, and were maintained in 5% CO<sub>2</sub> at 28 °C.

106 EBIV isolate Cu20-XJ was first isolated from *Culex modestus* mosquitoes in  
107 Xinjiang, China (20). The EBIV virus stock was propagated in BHK-21 cells in  
108 DMEM containing 2% FBS, subpackaged and stored at -80 °C. The rEBIV/WT and  
109 reporter virus rEBIV/eGFP/S were produced through the transfection of the plasmids  
110 (described below) into BSR-T7 cells with transcription plasmids (described below).  
111 All the work with infectious virus were conducted in the biosafety level-2 (BSL-2)  
112 laboratory.

113 The mouse polyclonal antibody against EBIV N protein was generated by  
114 immunization of BALB/C mice with the purified EBIV N protein. Alexa Fluor<sup>TM</sup> 594  
115 goat anti-mouse IgG (H+L) used as secondary antibody was purchased from  
116 Invitrogen.

117

### 118 **2.2 Sequencing of EBIV genome 5' ends**

119 EBIV were first concentrated by adding 3.2 g polyethylene glycol (PEG) 8000 (8%,

120 W/V, Millipore PEG8000, Sigma, USA) and 0.9 g NaCl (0.3 mol/L, Millipore Sigma,  
121 USA) to 40 mL virus supernatant (23). The suspension was mixed vigorously and  
122 incubated overnight at 4°C. Then the supernatant was discarded after centrifugation at  
123  $9000 \times g$  for 30 min at 4°C. The pellet was resuspended in 200  $\mu$ L PBS. Then the  
124 viral RNA was isolated using Trizol reagent (Invitrogen). First strand cDNA synthesis  
125 was carried out with one microgram RNA, Random Primer Mix (Takara) and 200 U  
126 SMARTScribe Reverse Transcriptase (Takara). EBIV M/L segment-specific  
127 sequences were amplified by PCR including Universal Primer A Mix (Takara),  
128 Gene-Specific Primers (GSPs) (M:  
129 5'-GATTACGCCAAGCTTAGAACTAGTAGGTGGGGCTGCGAAG-3'; L:  
130 5'-GATTACGCCAAGCTTGGACTAAGATGTTGACGCAGCAGGAT-3'), 2.5  $\mu$ L  
131 cDNA and 1.25 U SeqAmp™ DNA polymerase (Takara). The PCR products were  
132 separated in a 1% agarose gel and recovered with a Gel extraction kit (Omega). While  
133 the PCR products were weak or smear bands, the PCR would be conducted again with  
134 diluted PCR products, Universal Primer Short and Nest Gene-Specific Primers  
135 (NGSPs) (M:  
136 5'-GATTACGCCAAGCTTGTGCCATATCAGGACCCTGTGAGACC-3'; L:  
137 5'-GATTACGCCAAGCTTGGAGGAGAAATGAGGAAGGCAATC-3'). Amplicons  
138 were cloned into vector pRACE (Takara) and individual clones were selected for  
139 nucleotide sequencing.

140

### 141 **2.3 Plasmid construction**

142 Full-length cDNA from the S, M, and L segments (GenBank accession no. KJ710423,  
143 KJ710424, KJ710425) was obtained by reverse transcription of EBIV RNA using  
144 GoScript™ Reverse Transcriptase (Promega, USA) and a pair of DNA primers  
145 complementary to the 5' and 3' end of the viral genomic RNAs. Complete cDNAs  
146 were sequence-amplified by PCR using KOD One™ PCR Master Mix -Blue-  
147 (TOYOBO, Japan) and were cloned into pSMART-LCK plasmid (Lucigen,  
148 Middleton, WI, USA) containing a T7 RNA polymerase promoter, hepatitis D  
149 ribozyme and T7 RNA polymerase terminator motif (abbreviated to pLCK), (24). As

150 shown in Fig. 1A, C and D, the resulting plasmids (pLCK-EBIV-S, pLCK-EBIV-M,  
151 and pLCK-EBIV-L) containing viral different segment sequences located between a  
152 T7 promoter and a hepatitis D ribozyme T7 polymerase terminator motif. In the  
153 plasmid pLCK-EBIV-eGFP/S, the *eGFP* gene was fused with the porcine  
154 teschovirus-1 2A peptide linker sequence (P2A), a together inserted before the ORF of  
155 EBIV S segment (Fig. 1B). The P2A peptide is a self-cleaving peptide allowing  
156 separate expression of two proteins via a ribosomal skipping event during its  
157 translation (25). The reporter virus rEBIV/eGFP/S was generated through the  
158 transfection of the plasmids (pLCK-EBIV-eGFP/S, pLCK-EBIV-M, and  
159 pLCK-EBIV-L) into BSR-T7 cells. All the constructs were confirmed by sequencing  
160 and submitted to the Genbank (Accession No: ON055165 to ON055168).

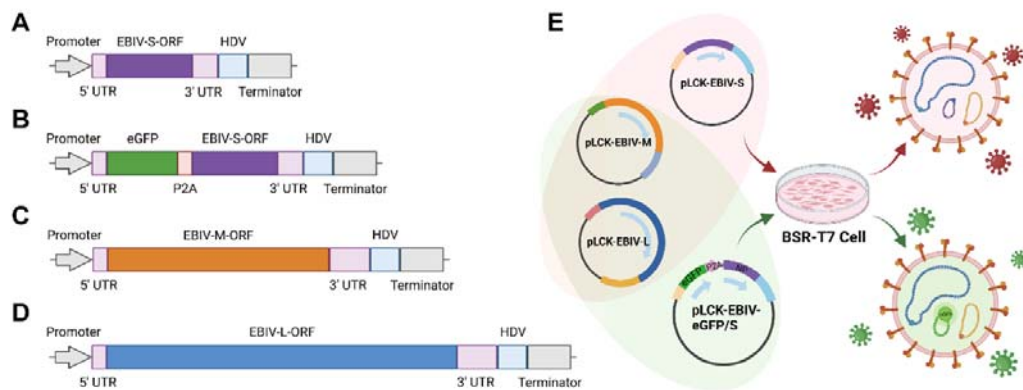

161  
162 **Fig 1. Structure diagram and transfection strategy of the recombinant plasmids**  
163 **rescue the recombinant EBIV.** (A) The recombinant pLCK plasmid of S segment,  
164 named pLCK-EBIV-S. (B) Based on pLCK-EBIV-S, eGFP and P2A gene were added  
165 between 5' UTR and N protein ORF, named pLCK-EBIV-eGFP/S. (C) The  
166 recombinant plasmid of M segment, named pLCK-EBIV-M. (D) The recombinant  
167 pLCK plasmid of L segment named pLCK-EBIV-L. (E) Transfection strategy for  
168 rEBIV/WT and rEBIV/eGFP/S. Based on the pSMART-LCK plasmid, the pLCK  
169 plasmid were reconstructed by inserting the T7 promoter upstream the 5' UTR and  
170 HDV downstream the 3' UTR.

171

172 **2.4 Virus rescue and plaque assay**

173 Rescue of recombinant viruses was performed in BSR-T7 cells, which constitutively  
174 express T7 polymerase. As shown in Fig 1E, a 50% confluent monolayer of BSR-T7  
175 cells grown in 12-well plates was transfected with 300 ng pLCK-EBIV-S, 500 ng  
176 pLCK-EBIV-M, and 700 ng pLCK-EBIV-L. When obvious cytopathic effect (CPE)  
177 appeared, supernatants contained the rEBIV/WT were harvested.

178 For the rescue of reporter virus, the pLCK-EBIV-eGFP/S (500ng), which was the  
179 substitute of pLCK-EBIV-S, was added in the transfection. At the next day post  
180 transfection, the green fluorescence could be observed by the inverted fluorescent  
181 microscope. The supernatants of cell culture were harvested at 120 h post transfection,  
182 labeled as rEBIV/eGFP/S and stored at -80 °C.

183 The rescued viruses were subjected to a serial dilution of 10-fold with DMEM until  
184  $10^{-6}$ . Add 100  $\mu$ l virus diluent into each well of 24-well plates containing the  
185 monolayer BHK-21. After 1 h incubation, the virus diluent was discarded, and each  
186 well was were added with 500  $\mu$ l DMEM covering containing 1.5% methyl cellulose.  
187 The cells would be cultured at 37 °C in 5% CO<sub>2</sub>. Three days later, the cells were fixed  
188 overnight with 3.7% formaldehyde and stained with 2% crystal violet for 15 min. The  
189 amount and size of plaques were recorded.

190

## 191 **2.5 Immunofluorescence assay**

192 The EBIV-WT, rEBIV/WT and rEBIV/eGFP/S viruses were seeded on a 12-well  
193 plate containing BHK-21 cell, respectively. After 24 hours, the cells were fixed in  
194 cold (-20 °C) 100% methanol for 5 min at -20 °C and washed three times with PBS.  
195 For the permeabilization, add the PBS containing 0.1% Triton X-100 and incubate  
196 them for 15 min at room temperature. After that, wash them with PBS three times,  
197 add the PBS containing 2% BSA, and incubated them for 60 min at room temperature.  
198 Then the cells were incubated with the mouse polyclonal antibody against EBIV-NP  
199 (1:250 diluted in PBS containing 0.1% BSA) overnight at 4°C. After washing with  
200 PBS three times, the cells were incubated with goat anti-mouse IgG conjugated with  
201 Alexa Fluor 594 (1:250 diluted in PBS with 0.1% BSA) at room temperature for 1 h  
202 (avoid light). Following three times of PBS washing, the DAPI was added to the cells,

203 and keep in for 5 min at room temperature. Then the fluorescence signal of each well  
204 was observed and analyzed under an Olympus fluorescence microscope at 200 ×  
205 magnification (26).

206

## 207 **2.6 Viral growth kinetics**

208 To compare the differences in replication among the three viruses, the growth kinetics  
209 of EBIV-WT, rEBIV/WT and rEBIV/eGFP/S viruses on BHK-21 were examined  
210 respectively. Approximately  $1 \times 10^4$  BHK-21 cells were seeded in a 17.5 mm dish.  
211 After incubation overnight, the cells were infected with 1mL EBIV-WT, rEBIV/WT  
212 or rEBIV/eGFP/S virus at MOI of 0.01. After incubation for one hours, the  
213 supernatants were collected, the cells were washed with PBS for three times and  
214 replaced with fresh medium with 2% FBS. Every 24 hours post infection, the  
215 supernatants were collected and stored at  $-80$  °C. At last, they were subjected to  
216 plaque assay to determine the viral titer. For rEBIV/eGFP/S infection, the expression  
217 of eGFP gene was observed under the fluorescence microscope at 100 ×  
218 magnification.

219

## 220 **2.7 Stability of the rEBIV/eGFP/S virus in cell culture**

221 To analyze whether the eGFP reporter gene can be stable presence during the passage,  
222 the rEBIV/eGFP/S virus was serially passaged in vertebrate-derived BHK-21 cells for  
223 ten rounds respectively. For each generation, 200 µL viruses were used to infect naïve  
224 BHK-21 cells, and the percentage of cells expressing eGFP was evaluated at 24-48  
225 hpi (hour post infection) after each passage. In addition, the RNAs of the infected  
226 cells were extracted in each passage and separated into two parts, one subjected to  
227 RT-PCR using PrimeScript™ One Step RT-PCR Kit Ver.2 (Dye Plus) (Takara,  
228 Japan), then the region between S-5'UTR and N protein-ORF genes was amplified to  
229 monitor the expression of eGFP.

230 The rest of RNAs were performed with real-time reverse transcription PCR  
231 (RT-qPCR) using a Luna® Universal Probe One-Step RT-qPCR Kit (New England  
232 Biolabs) according to the manufacturer's recommendations by a thermocycler



233 (BIO-RAD CFX96™ Real-Time System). The primers for RT-qPCR targeted the N  
234 protein (S segment) of EBIV, including EBIV-NP-F (5'-  
235 GGTACCTCTGGCGCATTGTCTTTTC-3'), EBIV-NP-R (5'-  
236 GAAAAATGGCATCACCTGGGAAAGT-3'), and EBIV-NP-Probe (5'-FAM-  
237 TTTTGGGTCCATCTCTTTTCCTCTGC-BHQ1-3'). Both of primers were synthesized  
238 by TSINGKE (Wuhan Branch, China). Twenty microliter reaction mixtures  
239 containing 2 µL of viral RNA and 0.8 µL of each primer were incubated at 55 °C for 10  
240 min and 95 °C for 1 min followed by 40 cycles of 95 °C for 10 s and 55 °C for 30 s.

241

## 242 **2.8 Cell tropism of rEBIV/eGFP/S**

243 Cells from different sources, including Vero E6, SW13, PK15, LMH and C6/36 cells,  
244 were seeded in 6-well plates, respectively. After incubated overnight the cells were  
245 infected with the rEBIV/eGFP/S virus at MOI of 0.1. After 1 h incubation in 37 °C,  
246 the virus diluent was discarded, and fresh cell culture medium was added then  
247 cultured at 37 °C. The cells would be observed and taken the pictures were taken  
248 every day (from day 0 to day 7) to record the virus infection.

249

## 250 **2.9 High-content Screening assay conditions**

251 The cell density, infective dose, and assay endpoint were the same as the previous  
252 described (27). Cell densities (10,000 cells per well) of BHK-21 cells were infected at  
253 MOI values 0.01. And two drugs Ribavirin and Favipiravir were serially diluted  
254 ranging from 50 µM to 0.78125 µM to obtain the EC50. Fluorescent signal was  
255 detected by Operetta imaging system (Perkin Elmer) at 36 h after rEBIV/eGFP/S  
256 inoculation, and the cell viability was detected under a microscope at the same time.  
257 Statistical calculations of Z'- values were made as follows:  $Z' = 1 - (3SD \text{ of sample} +$   
258  $3SD \text{ of control}) / (|\text{Mean of sample} - \text{Mean of control}|)$  (28). Here, SD is the standard  
259 deviation of the fluorescent signals from cell control or sample. Z' value is  
260 meaningful within the range of  $-1 < Z' \leq 1$ , the larger the value the higher the data  
261 quality, and between 0.5 and 1 are considered good quality. Then the experiment was  
262 repeated on EBIV-WT by plaque assay to confirm the antiviral results.

263 A library of 96 compounds from natural extracts was purchased from Weikeqi  
264 Biotech (Sichuan, China). Compounds were stored as 20 mM stock solutions in  
265 DMSO at  $-80^{\circ}\text{C}$  until use. BHK-21 cells were dissociated and seeded at a density of  
266  $1 \times 10^4$  cells per well in 96-well plates. After overnight incubation, cell monolayers  
267 were treated with the compounds at a final concentration of 10  $\mu\text{M}$  and at the same  
268 time infected with the rEBIV/eGFP/S at the MOI of 0.01. DMEM with 2% FBS and  
269 0.1% DMSO was negative control, and 50  $\mu\text{M}$  Ribavirin was used as positive control.  
270 After 36 h incubation, the fluorescent signal in all wells was detected by Operetta  
271 imaging system (PerkinElmer) and the Z' factor was calculated and analyzed.

272

### 273 **3 Result**

#### 274 **3.1 Construction and characterization of rEBIV/WT and rEBIV/eGFP/S**

275 We constructed an infectious cDNA clone of EBIV which was isolated from *Culex*  
276 *modestus* mosquitoes in 2014 in Xinjiang (20). As depicted in Fig. 1A, C, D, three  
277 segments covering the complete genome sequence of EBIV were chemically  
278 synthesized and then cloned into a low-copy-number vector as described in materials  
279 and methods. We also designed the EBIV reporter virus with eGFP gene using the  
280 similar strategy used for CCHFV/ZsG reporter virus (29). The eGFP gene with P2A  
281 was inserted between the 5' UTR and N protein-ORF region of pLCK-EBIV-S (Fig.  
282 1B). The resulted clone was designated as pLCK-EBIV-eGFP/S as described in  
283 materials and methods.

284 The two group of transcription plasmids (one is pLCK-EBIV-S + pLCK-EBIV-M +  
285 pLCK-EBIV-L, while another is pLCK-EBIV-eGFP/S + pLCK-EBIV-M +  
286 pLCK-EBIV-L, as shown in Fig. 1E) were transfected into BSR-T7 cells, respectively,  
287 to test the viral rescue function of the infectious clone. The supernatants were  
288 collected every day (called rEBIV/WT and rEBIV/eGFP/S) and subjected to plaque  
289 assay to determine the plaque morphology. EBIV-WT, rEBIV/WT and rEBIV/eGFP/S  
290 were seeded in BHK-21 cells respectively at MOI=0.01 for virus production, one  
291 plate with three viruses were fixed at 24 hpt (hour post transfection) and subjected to

292 IFA using specific antibody against EBIV N protein to detect viral protein synthesis.  
293 The supernatants from another plate with three viruses were collected every day and  
294 their titer were determined to study the growth dynamics of three viruses.

295 As shown in Fig. 2A and 2B, when transfected the transcription plasmids for rEBIV,  
296 the CPE appeared at 24 hpt and got obvious at 48 hpt. While for rEBIV/eGFP/S,  
297 although the bright green fluorescence could be observed on the second day of  
298 transfection, the CPE appeared on the 4 dpt, and got apparent on 5 dpt (SFig 1). The  
299 rescue efficiency could get to 70% (positive detection in 7 of 10 replica wells) in once  
300 successive rescue experiment (results not shown). The IFA results showed (Fig. 2C)  
301 that the IFA-positive cells of rEBIV/WT were almost 100% among the infected cells  
302 at 24 hpt, which was similar to EBIV-WT, while the rEBIV/eGFP/S showed less  
303 IFA-positive cells at 24 hpt.

304 The viral plaque morphology for rEBIV/WT measured at different time points were  
305 homogeneously large in BHK-21 cells, besides, both shape and size seemed similar to  
306 that of wild type virus. On the other hand, the rEBIV/eGFP/S displayed obviously  
307 smaller plaques than EBIV-WT and rEBIV (Fig. 2D). At the same time, the viral  
308 growth kinetics (Fig. 2E) showed the rEBIV/WT exhibited indistinguishable patterns  
309 of replication with wild type virus in BHK-21, whereas the viral productions of  
310 rEBIV/eGFP/S were about 100-fold lower than that of wild type virus at the same  
311 MOI.

312 These results demonstrated that these two rescued viruses both recovered by the  
313 infectious clone replicated efficiently. However, differences in IFA positive rate, viral  
314 plaques morphology and viral kinetics between EBIV-WT and rEBIV/eGFP/S,  
315 illustrate that the insertion of the eGFP reporter gene into EBIV genome affected the  
316 viral replication in BHK-21 cell.

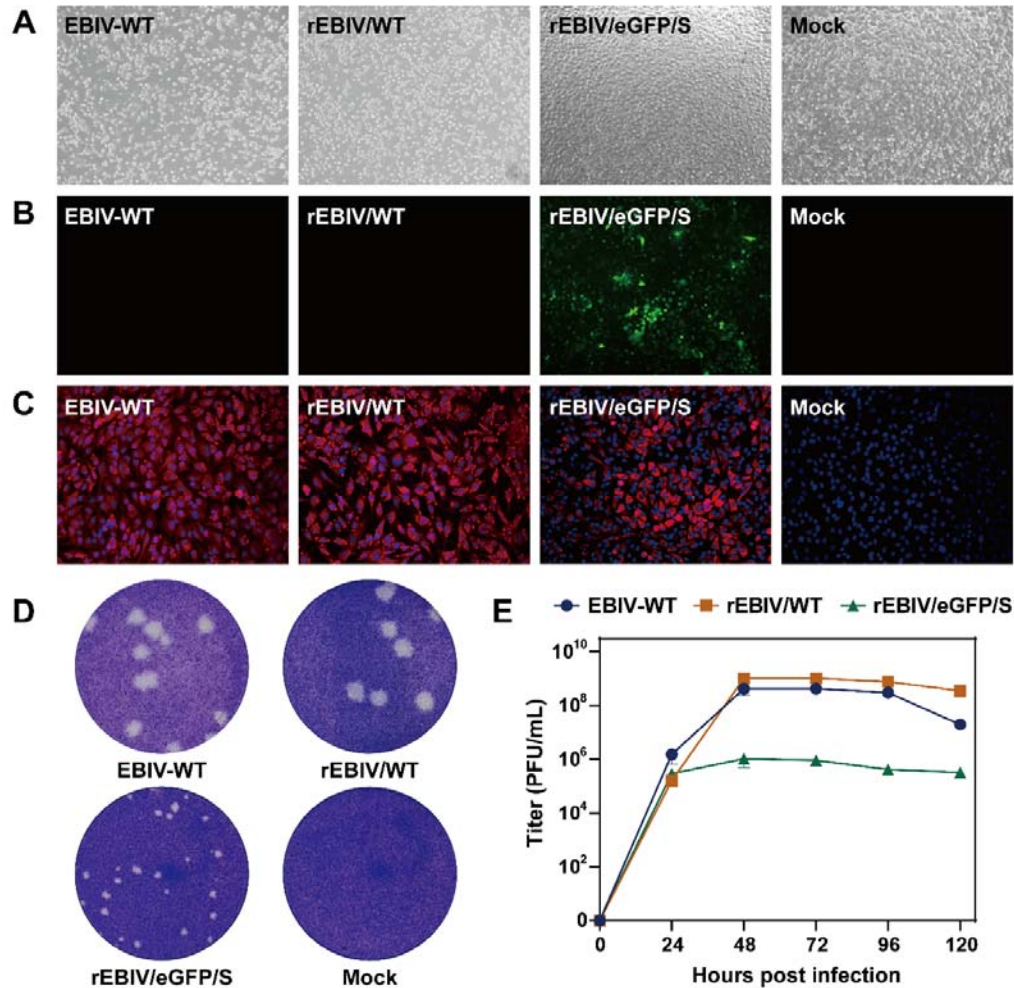

317

318 **Fig 2. Characterization of wild type EBIV, rEBIV/WT and rEBIV/eGFP/S.** (A)  
319 the cell state at 48 hpt. (B) Analysis of eGFP expression in the BSR-T7 cells and the  
320 expression of eGFP was detected under a fluorescent microscope at the 48 hpt. (C)  
321 IFA of viral protein expression in BHK-21 cells infected with the three viruses. IFA  
322 was performed at the 24 hpi using the antibody against the N protein. (D) Plaque  
323 morphology of the three viruses. (E) Growth kinetics curves of wild type EBIV,  
324 rEBIV/WT and rEBIV/eGFP/S.

325

### 326 **3.2 Stability of the rEBIV/eGFP/S virus in cell culture**

327 To analyze whether the eGFP reporter gene can be stably maintained in cell culture,  
328 the rEBIV/eGFP/S virus was serially passaged in BHK-21 cells for ten rounds. As  
329 shown in Fig. 3A, all of the BHK-21 cells infected by P1-P10 reporter viruses showed

330 strong fluorescence signals and nearly 100% were eGFP positive when the apparent  
331 CPE appeared, indicating the eGFP gene was stably maintained during passaging. In  
332 addition, for each passage, the RNAs of the infected cells were extracted and  
333 subjected to RT-PCR to test gene stability. Different sizes of bands were expectedly  
334 detected for WT (151 bp) and reporter virus (868 bp) as the insertion of the eGFP  
335 gene (Fig. 4B). Each of the P1-P10 RNAs extracted from BHK-21 cells displayed a  
336 specific band showing no sequence deletion within the reporter gene which is  
337 confirmed by sequencing, further suggesting the stability of the reporter virus in  
338 BHK-21 cells.  
339

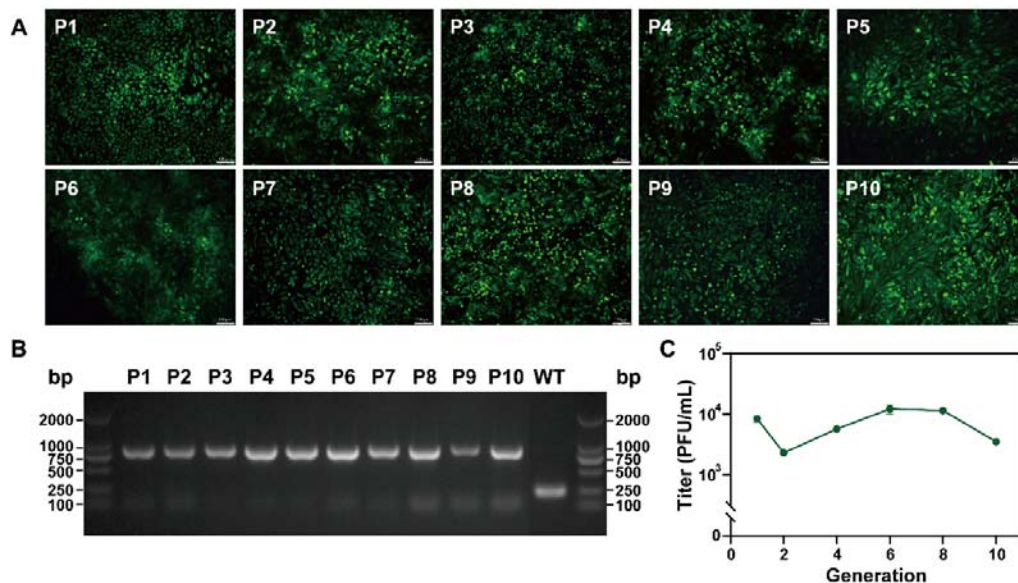

340  
341 **Fig 3 Genetic stability of rEBIV/eGFP/S in BHK-21 cells.** (A) The eGFP  
342 expression of the different passages of rEBIV/eGFP/S in BHK-21 cell. The  
343 rEBIV/eGFP/S was serially passaged in BHK-21 cells for ten rounds. The expression  
344 of eGFP was detected under a fluorescent microscope at 48 h after infection. (B)  
345 Detection of the eGFP gene during virus passage in BHK-21 cell. Total RNAs from  
346 the infected cells were extracted and subjected to RT-PCR detection using the primers  
347 spanning 5'UTR to N protein gene that include the complete eGFP gene. The  
348 resulting RT-PCR products were resolved by 1% agarose gel electrophoresis. (C) The

349 titer of 1<sup>st</sup> to 10<sup>th</sup> generation of rEBIV/eGFP/S. The virus titers were calculated by  
350 RT-qPCR results.

351

### 352 **3.3 Wide cell tropism and efficient replication in different cell cultures**

353 To further confirm the viral infectivity to cells of different origin, five cell lines were  
354 selected and inoculated with the rEBIV/eGFP/S at MOI=0.1. Pictures were taken  
355 from D1 to D10 to observe fluorescence in cell. As shown in Fig 4, all five cell lines  
356 could be infected by rEBIV/eGFP/S, but with different sensitivities. LMH cells were  
357 highly susceptible to rEBIV/eGFP/S, suggesting that EBIV could be transmitted  
358 among avian species, which consistent with previous reports (22). Besides, the  
359 rEBIV/eGFP/S is also high infectious to C6/36 cells, just as we speculated, since  
360 EBIV is an arbovirus that isolated from mosquitoes. However, SW13, Vero E6 and  
361 PK15 showed a bit lower susceptible to rEBIV/eGFP/S when compared to LMH and  
362 C6/36 cells.

363

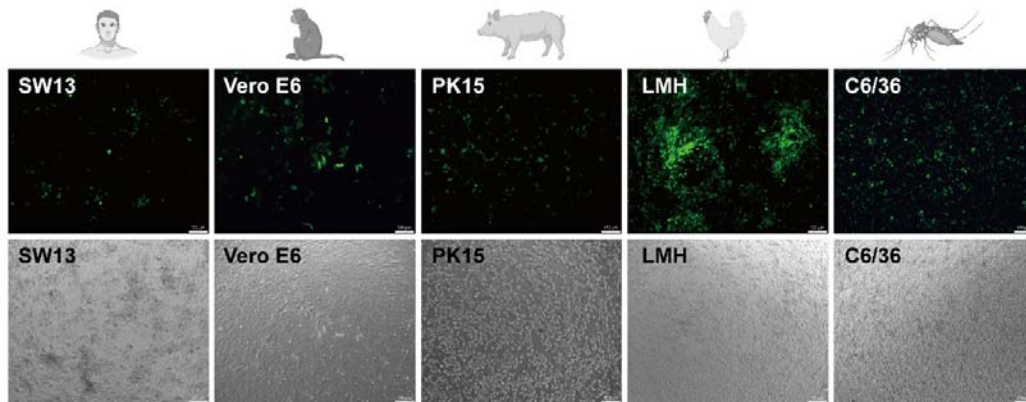

364

365 Fig. 4. Cell lines derived from human, monkey, pig, avian, and mosquito infected  
366 with rEBIV/eGFP/S.

367

### 368 **3.4 Antiviral activity evaluation based on the rEBIV/eGFP/S reporter virus**

369 Ribavirin and favipiravir (also known as T-705) were both broad-spectrum antiviral  
370 drugs that found to inhibit the RdRp of RNA viruses (30)(31), and had been reported  
371 to have inhibitory effect on several orthobunyaviruses replication, such as LACV

372 (32)(33), BUNV (34), Jamestown Canyon virus (JCV) (33). In order to validate the  
373 utility of rEBIV/eGFP/S reporter virus for antiviral screening, we compared the  
374 antiviral ability of ribavirin and favipiravir on rEBIV/eGFP/S. BHK-21 cells were  
375 infected with rEBIV/eGFP/S at an MOI of 0.01 and respectively treated with different  
376 final concentrations of ribavirin and favipiravir (0  $\mu$ M-50  $\mu$ M) at the same time. At 36  
377 hpi, the fluorescence value was read by Operetta imaging system (PerkinElmer), and  
378 the cell viability was detected under a microscope. The inhibition rate was derived  
379 from the ratio of the fluorescence value of the concentration to the negative contrast  
380 from the fluorescence number of each concentration minus the negative contrast, and  
381 divided by the negative contrast. The inhibition rate in the rEBIV/eGFP/S infected  
382 BHK-21 increased dramatically in a dose-dependent manner of ribavirin (Fig. 5A).  
383 The EC50 of ribavirin calculated by inhibition rate was 21.91  $\mu$ M. However, the  
384 favipiravir was inactive against rEBIV/eGFP/S even at 50  $\mu$ M (Fig. 5B), which is  
385 similar with the wild type EBIV (Fig. 5C, D). These results indicated that the  
386 anti-EBIV activity of compound can be rapidly evaluated by eGFP signal detection of  
387 the rEBIV/eGFP/S infected cells.

388 We further chose 25  $\mu$ M ribavirin as positive control, and tested the anti-  
389 rEBIV/eGFP/S activity of the library of compounds from nature product. The  
390 BHK-21 cells were infected with rEBIV/eGFP/S at an MOI of 0.01 and treated with  
391 various compounds (10  $\mu$ M). The fluorescence value was read at 36 hpi, and the cell  
392 viability was observed at the same time. The Z' factor of the positive and negative  
393 control is 0.46, indicates that this model is not very good but acceptable. As depicted  
394 in Fig. 5C and several compounds showed a significant inhibitory effect on  
395 rEBIV/eGFP/S replication with higher Z factors (the raw data of the screening is in  
396 STable). The wells with Clinodiside A, Diosmin, Secoxyloganin, Disoglucide, and  
397 Cyanidin-3-O-glucoside showed both high Z factors and 100% cell viability, proving  
398 they may be potential effective anti-EBIV drugs. Overall, these results demonstrated  
399 that the rEBIV/eGFP/S reporter virus provides a rapid and precise tool for antiviral  
400 inhibitors screening against EBIV.

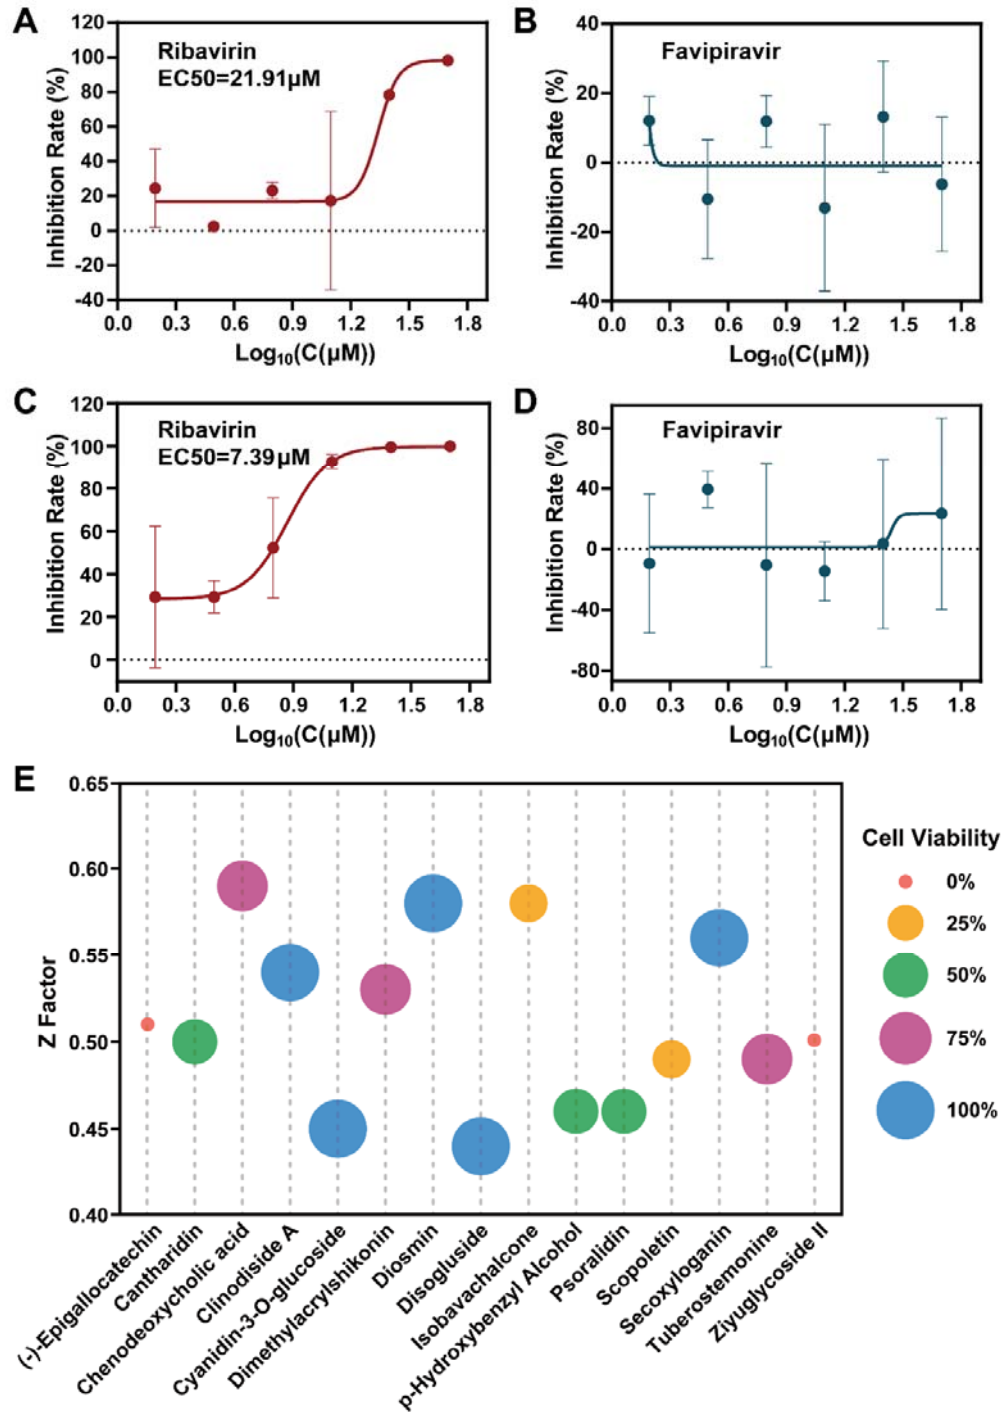

401

402 **Fig. 5 Antiviral activity of ribavirin, favipiravir and some medicines on**

403 **rEBIV/eGFP/S. (A) Inhibition rate of different concentrations of ribavirin (0-50  $\mu$ M)**

404 **on the eGFP expression of the rEBIV/eGFP/S infected cells at 36 hpi. The EC50 was**

405 **calculated by nonlinear regression using Prism software (GraphPad) as shown was**



406 21.91  $\mu\text{M}$ . Error bars indicate the standard deviations from three independent  
407 experiments. (B) Inhibition rate of rEBIV/eGFP/S infected BHK-21 cells treated with  
408 different concentrations of favipiravir. And favipiravir had no inhibitory effect on  
409 rEBIV/eGFP/S. (C), (D) Inhibition rate of different concentrations of ribavirin and  
410 favipiravir (0-50  $\mu\text{M}$ ) on wild type EBIV, tested by plaque assay. (E) The library of  
411 compounds was scanned, and the Z factor of each compound and positive control  
412 were obtained by the fluorescence value. The compounds that had higher Z factor  
413 than positive controls were shown in the table. The different colors and sizes of  
414 circles indicated their respective cell viability.

415

#### 416 **4 Discussion**

417 EBIV as a newly classified orthobunyavirus as a new species in the *Peribunyaviridae*  
418 showed potential threat to human or animal health. In order to develop reliable tools  
419 for EBIV study, here we successfully constructed the infectious clones of EBIV and  
420 an eGFP reporter virus rEBIV/eGFP/S. By the standard virus rescue procedure, we  
421 identified that the rEBIV/WT virus showed indistinguishable replication efficiency  
422 with the wild type EBIV (Cu20-XJ) in BHK-21 cells, while the insertion of eGFP  
423 reduced the replication efficiency. The eGFP gene expression level within the  
424 rEBIV/eGFP/S infected cells correlated well with the viral replication, inferring that  
425 the growth of reporter virus can be monitored directly by eGFP observation. The  
426 rEBIV/eGFP/S could stably passage in BHK-21 cells and show different tropism on  
427 cell lines of different sources. After validating the same medicines (ribavirin and  
428 favipiravir) had the same inhibitory effect on both wild type EBIV and rEBIV/eGFP/S  
429 in BHK-21, we confirmed the feasibility of the rEBIV/eGFP/S for rapid antiviral  
430 screening assay, and five compounds were found to have an inhibitory effect on the  
431 EBIV.

432 In our study, the eGFP gene was first inserted into the N or C-terminal of N protein  
433 directly, however, neither approach rescued the virus. We considered that this may  
434 because the eGFP affected the normal expression and native structure of N protein,  
435 leading to the failure of the virus to replicate and package normally. Then we added

436 P2A between eGFP and N protein, allowing separate expression of these two proteins,  
437 to get infectious rEBIV/eGFP/S. But the results of plaque assays and growth curves  
438 suggested that the virus was significantly different from the wild type, possibly  
439 because of the insertion of eGFP may affect the expression of NSs protein, which has  
440 multiple functions in the viral replication cycle and is the major virulence factor (35)  
441 but dispensable for virus growth (36)(37). We also tried to insert the P2A with eGFP  
442 between 3' UTR and N protein ORF, but also failed. The reason would be when the N  
443 protein precedes P2A, it will carry more than 20 amino acid tails during translation  
444 shearing, which may affect the function of N protein. As for other two segments, there  
445 has been successful rescued cases on M segment in Bunyamwera virus (38), which  
446 replaced almost half of the N terminal of Gc to eGFP. However, insert report gene to  
447 L segment has not been studied yet, which may due to the large size of L and potential  
448 difficulty to modify the RdRp and preserving its polymerase activity.

449 To evaluate the rEBIV/eGFP/S stability in both mammalian and mosquito cell lines,  
450 we also did continuous passages of rEBIV/eGFP/S on C6/36 cells. To our surprise,  
451 although the fluorescence could be observed and the eGFP gene could be detected by  
452 RT-PCR using specific eGFP primers, the eGFP gene seemed to switch places since  
453 the bands significantly shorter when using the primers for sequences outside the eGFP  
454 from the second generation (SFig 2). The similar gene loss with unknown mechanism  
455 has been reported in other viruses in C6/36 cells(39)(40)(41), we speculated that due  
456 to the different replication mechanisms of EBIV between mammalian and insect cells,  
457 the insertion of an additional ORF into the viral genome may affect RNA replication  
458 and the stability of inserted gene in C6/36 but not in BHK-21 cells. Further work is  
459 needed to test this hypothesis.

460 Ribavirin is the first synthetic nucleoside analogue that has ever been reported to be  
461 active against a broad spectrum of RNA viruses (such as hepatitis C virus (HCV),  
462 Respiratory Syncytial Virus (RSV), and influenza virus) (42). And it can also reduce  
463 the replication of EBIV, and the EC<sub>50</sub> of rEBIV/eGFP/S is 21.91  $\mu$ M which is similar  
464 to BUNV-mCherry (34). Favipiravir triphosphate shows broad-spectrum inhibitory  
465 activities against the RNA polymerases of influenza A viruses (including the highly

466 pathogenic H5N1 viruses) (43) and many other positive-sense RNA (such as West  
467 Nile virus (WNV) and Western equine encephalitis (WEE)) and negative-sense RNA  
468 viruses (such as Crimean-Congo hemorrhagic fever virus (CCHFV), Severe fever  
469 with thrombocytopenia syndrome virus (SFTSV), Rift valley fever virus (RVFV), and  
470 Ebola virus) (31). But in our study, the favipiravir is ineffective even at higher  
471 concentrations, the specific reasons need to be further explored. As for the antiviral  
472 candidates we found in this research, diosmin and cyanidin-3-O-glucoside were  
473 identified as inhibitor of SARS-CoV-2, since diosmin could bind covalently to the  
474 SARS-CoV-2 main protease, inhibiting the infection pathway of SARS-CoV-2 (44),  
475 and cyanidin-3-O-glucoside was demonstrated to inhibit M protein activity of  
476 SARS-CoV-2 in a dose-dependent manner at biologically relevant ( $\mu\text{M}$ )  
477 concentrations (45). The other three compounds, clinodiside A, secoxyloganin and  
478 disoglucoside, have not been reported to have antiviral effects yet. More antiviral  
479 mechanisms and minimum effective dose need to be further studied.

480 In conclusion, we have established the reverse genetic system for EBIV, and  
481 rescued a reporter virus rEBIV/eGFP/S. The reporter virus showed good stability in  
482 BHK-21 cell and different tropism in various cell lines. The reporter virus based  
483 antiviral assay developed in this study will facilitate the antiviral screening for novel  
484 anti-EBIV agents.

485

#### 486 **Funding**

487 This work was supported by the Wuhan Science and Technology Plan Project  
488 (2018201261638501)

489

#### 490 **Author Contributions**

491 HX and ZY designed the experiments. NR, FW, LZ, LW, and JQ performed the  
492 experiments. NR, FW, and JQ analyzed the data. GZ, EB, and BZ contributed the  
493 reagents, materials, and analysis tools. NR, FW, EB, ZY and HX wrote and review the  
494 manuscript. All authors contributed to the article and approved the submitted version.

495

496 **Acknowledgments**

497 We would like to thank the valuable suggestions from Prof. Ke Peng (Wuhan Institute  
498 of Virology) and Dr. Shufen Li (Wuhan Institute of Virology) to our experiment, and  
499 Ding Gao and An-Na Du from the Core Facility and Technical Support, Wuhan  
500 Institute of Virology, for their help with HCS.

501

502 **Reference**

- 503 1. Dong X, Soong L. Emerging and Re-emerging Zoonoses are Major and Global  
504 Challenges for Public Health. *Zoonoses*. 2021;1(1):7–8.
- 505 2. Abudurexiti A, Adkins S, Alioto D, Alkhovsky S V., Avšič-Županc T,  
506 Ballinger MJ, et al. Taxonomy of the order Bunyavirales: update 2019. *Arch*  
507 *Virool*. 2019;164(7):1949–65.
- 508 3. Hughes HR, Adkins S, Alkhovskiy S, Beer M, Blair C, Calisher CH, et al.  
509 ICTV virus taxonomy profile: Peribunyaviridae. *J Gen Virol*. 2020;101(1):1–2.
- 510 4. Elliott RM. Orthobunyaviruses: recent genetic and structural insights. *Nat Rev*  
511 *Microbiol* [Internet]. 2014;12(10):673–85. Available from:  
512 <http://dx.doi.org/10.1038/nrmicro3332>
- 513 5. Sakkas H, Bozidis P, Franks A, Papadopoulou C. Oropouche fever: A review.  
514 *Viruses*. 2018 Apr 1;10(4).
- 515 6. Harding S, Greig J, Mascarenhas M, Young I, Waddell LA. La Crosse virus: A  
516 scoping review of the global evidence. *Epidemiol Infect* [Internet]. 2019;147.  
517 Available from: <https://doi.org/10.1017/S0950268818003096>
- 518 7. Fausta Dutuze M, Nzayirambaho M, Mores CN, Christofferson RC. A Review  
519 of Bunyamwera, Batai, and Ngari viruses: Understudied Orthobunyaviruses  
520 with potential one health implications. *Front Vet Sci*. 2018;5(APR):1–9.
- 521 8. Brenner J, Behar A. Simbu viruses' infection of livestock in israel—a transient  
522 climatic land. *Viruses* [Internet]. 2021;13(11). Available from:  
523 <https://doi.org/10.3390/v13112149>
- 524 9. Beer M, Conraths FJ, Van Der Poel WHM. “Schmallenberg virus” - A novel  
525 orthobunyavirus emerging in Europe. *Epidemiol Infect* [Internet].  
526 2013;141(1):1–8. Available from: <https://doi.org/10.1017/S0950268812002245>
- 527 10. Oymans J, Schreur PJW, Van Oort S, Vloet R, Venter M, Pijlman GP, et al.  
528 Reverse genetics system for shuni virus, an emerging orthobunyavirus with  
529 zoonotic potential. *Viruses*. 2020;12(4):1–12.
- 530 11. Kraatz F, Wernike K, Reiche S, Aebischer A, Reimann I, Beer M.  
531 Schmallenberg virus non-structural protein NSm: Intracellular distribution and  
532 role of non-hydrophobic domains. *Virology* [Internet]. 2018;516(December  
533 2017):46–54. Available from: <https://doi.org/10.1016/j.virol.2017.12.034>
- 534 12. Ariza A, Tanner SJ, Walter CT, Dent KC, Shepherd DA, Wu W, et al.  
535 Nucleocapsid protein structures from orthobunyaviruses reveal insight into  
536 ribonucleoprotein architecture and RNA polymerization. *Nucleic Acids Res*.  
537 2013;41(11):5912–26.

- 538 13. Van Knippenberg I, Carlton-Smith C, Elliott RM. The N-terminus of  
539 Bunyamwera orthobunyavirus NSs protein is essential for interferon  
540 antagonism. *J Gen Virol.* 2010;91(8):2002–6.
- 541 14. Barry G, Varela M, Ratinier M, Blomström AL, Caporale M, Seehusen F, et al.  
542 NSs protein of Schmallerberg virus counteracts the antiviral response of the  
543 cell by inhibiting its transcriptional machinery. *J Gen Virol.* 2014;95(PART  
544 8):1640–6.
- 545 15. Dunlop JI, Szemiel AM, Navarro A, Wilkie GS, Tong L, Modha S, et al.  
546 Development of reverse genetics systems and investigation of host response  
547 antagonism and reassortment potential for Cache Valley and Kairi viruses, two  
548 emerging orthobunyaviruses of the Americas. *PLoS Negl Trop Dis.*  
549 2018;12(10):1–22.
- 550 16. Lowen AC, Noonan C, McLees A, Elliott RM. Efficient bunyavirus rescue  
551 from cloned cDNA. *Virology.* 2004;330(2):493–500.
- 552 17. Elliott RM, Blakqori G, van Knippenberg IC, Koudriakova E, Li P, McLees A,  
553 et al. Establishment of a reverse genetics system for Schmallerberg virus, a  
554 newly emerged orthobunyavirus in Europe. *J Gen Virol.*  
555 2013;94(PART4):851–9.
- 556 18. Blakqori G, Weber F. Efficient cDNA-Based Rescue of La Crosse  
557 Bunyaviruses Expressing or Lacking the Nonstructural Protein NSs. *J Virol.*  
558 2005;79(16):10420–8.
- 559 19. Ogawa Y, Sugiura K, Kato K, Tohya Y, Akashi H. Rescue of Akabane virus  
560 (family Bunyaviridae) entirely from cloned cDNAs by using RNA polymerase  
561 I. *J Gen Virol.* 2007;88(12):3385–90.
- 562 20. Liu R, Zhang G, Yang Y, Dang R, Zhao T. Genome sequence of Abbey Lake  
563 virus, a novel orthobunyavirus isolated from China. *Genome Announc.*  
564 2014;2(3):13845.
- 565 21. Xia H, Liu R, Zhao L, Sun X, Zheng Z, Atoni E, et al. Characterization of  
566 Ebinur Lake Virus and Its Human Seroprevalence at the China–Kazakhstan  
567 Border. *Front Microbiol.* 2020;10(January):1–11.
- 568 22. Zhao L, Luo H, Huang D, Yu P, Dong Q, Mwaliko C, et al. Pathogenesis and  
569 Immune Response of Ebinur Lake Virus: A Newly Identified Orthobunyavirus  
570 That Exhibited Strong Virulence in Mice. *Front Microbiol.* 2021;11(February).
- 571 23. Miura T, Masago Y, Sano D, Omura T. Development of an effective method  
572 for recovery of viral genomic RNA from environmental silty sediments for  
573 quantitative molecular detection. *Appl Environ Microbiol* [Internet].  
574 2011;77(12):3975–81. Available from: <https://journals.asm.org/journal/aem>
- 575 24. Zivcec M, Metcalfe MG, Albariño CG, Guerrero LW, Pegan SD, Spiropoulou  
576 CF, et al. Assessment of Inhibitors of Pathogenic Crimean-Congo Hemorrhagic  
577 Fever Virus Strains Using Virus-Like Particles. *PLoS Negl Trop Dis.*  
578 2015;9(12):1–23.
- 579 25. Kim JH, Lee SR, Li LH, Park HJ, Park JH, Lee KY, et al. High cleavage  
580 efficiency of a 2A peptide derived from porcine teschovirus-1 in human cell  
581 lines, zebrafish and mice. *PLoS One.* 2011;6(4):1–8.

- 582 26. Deng CL, Liu SQ, Zhou DG, Xu LL, Li XD, Zhang PT, et al. Development of  
583 neutralization assay using an eGFP chikungunya virus. *Viruses*.  
584 2016;8(7):1–16.
- 585 27. Li JQ, Deng CL, Gu D, Li X, Shi L, He J, et al. Development of a replicon cell  
586 line-based high throughput antiviral assay for screening inhibitors of Zika virus.  
587 *Antiviral Res* [Internet]. 2018;150(August 2017):148–54. Available from:  
588 <https://doi.org/10.1016/j.antiviral.2017.12.017>
- 589 28. Zhang JH, Chung TDY, Oldenburg KR. A simple statistical parameter for use  
590 in evaluation and validation of high throughput screening assays. Vol. 4,  
591 *Journal of Biomolecular Screening*. 1999. p. 67–73.
- 592 29. Welch SR, Scholte FEM, Flint M, Chatterjee P, Nichol ST, Bergeron É, et al.  
593 Identification of 2'-deoxy-2'-fluorocytidine as a potent inhibitor of  
594 Crimean-Congo hemorrhagic fever virus replication using a recombinant  
595 fluorescent reporter virus. *Antiviral Res* [Internet]. 2017;147(September):91–9.  
596 Available from: <http://dx.doi.org/10.1016/j.antiviral.2017.10.008>
- 597 30. De Clercq E, Li G. Approved antiviral drugs over the past 50 years. *Clin*  
598 *Microbiol Rev*. 2016;29(3):695–747.
- 599 31. Furuta Y, Komeno T, Nakamura T. Favipiravir (T-705), a broad spectrum  
600 inhibitor of viral RNA polymerase. *Proc Japan Acad Ser B Phys Biol Sci*  
601 [Internet]. 2017;93(7):449–63. Available from:  
602 <https://www.ncbi.nlm.nih.gov/pmc/articles/PMC5713175/pdf/pjab-93-449>
- 603 32. Gowen BB, Wong MH, Jung KH, Sanders AB, Mendenhall M, Bailey KW, et  
604 al. In vitro and in vivo activities of T-705 against arenavirus and bunyavirus  
605 infections. *Antimicrob Agents Chemother*. 2007;51(9):3168–76.
- 606 33. Kato H, Takayama-Ito M, Satoh M, Kawahara M, Kitaura S, Yoshikawa T, et  
607 al. Favipiravir treatment prolongs the survival in a lethal mouse model  
608 intracerebrally inoculated with Jamestown Canyon virus. *PLoS Negl Trop Dis*  
609 [Internet]. 2021;15(7):e0009553. Available from:  
610 <http://dx.doi.org/10.1371/journal.pntd.0009553>
- 611 34. Ter Horst S, Fernandez-Garcia Y, Bassetto M, Günther S, Brancale A, Neyts J,  
612 et al. Enhanced efficacy of endonuclease inhibitor baloxavir acid against  
613 orthobunyaviruses when used in combination with ribavirin. *J Antimicrob*  
614 *Chemother*. 2020;75(11):3189–93.
- 615 35. Eifan S, Schnettler E, Dietrich I, Kohl A, Blomström AL. Non-structural  
616 proteins of arthropod-borne bunyaviruses: Roles and functions. *Viruses*.  
617 2013;5(10):2447–68.
- 618 36. Varela M, Schnettler E, Caporale M, Murgia C, Barry G, McFarlane M, et al.  
619 Schmallenberg Virus Pathogenesis, Tropism and Interaction with the Innate  
620 Immune System of the Host. *PLoS Pathog*. 2013;9(1).
- 621 37. Bridgen A, Weber F, Fazakerley JK, Elliott RM. Bunyamwera bunyavirus  
622 nonstructural protein NSs is a nonessential gene product that contributes to  
623 viral pathogenesis. *Proc Natl Acad Sci U S A*. 2001;98(2):664–9.
- 624 38. Shi X, van Mierlo JT, French A, Elliott RM. Visualizing the Replication Cycle  
625 of Bunyamwera Orthobunyavirus Expressing Fluorescent Protein-Tagged Gc

- 626 Glycoprotein. *J Virol.* 2010;84(17):8460–9.
- 627 39. Zhang ZR, Zhang HQ, Li XD, Deng CL, Wang Z, Li JQ, et al. Generation and  
628 characterization of Japanese encephalitis virus expressing GFP reporter gene  
629 for high throughput drug screening. *Antiviral Res.* 2020;182(January).
- 630 40. Suphatrakul A, Duangchinda T, Jupatanakul N, Prasittisa K, Onnome S,  
631 Pengon J, et al. Multi-color fluorescent reporter dengue viruses with improved  
632 stability for analysis of a multi-virus infection. *PLoS One.* 2018;13(3):1–19.
- 633 41. Li X, Zhang H, Zhang Y, Li J, Wang Z, Deng C, et al. Development of a rapid  
634 antiviral screening assay based on eGFP reporter virus of Mayaro virus.  
635 *Antiviral Res [Internet].* 2019;168(March):82–90. Available from:  
636 <https://doi.org/10.1016/j.antiviral.2019.05.013>
- 637 42. Sidwell R, Huffman J, Khare G, Allen L, Witkowski J, Robins R. Broad  
638 spectrum antiviral activity of Virazole: 1-beta  
639 Dribofuranosyl-D-Broad-spectrum antiviral activity of Virazole: 1-beta  
640 Dribofuranosyl,. *Science (80- ).* 1972;177(1971):705–6.
- 641 43. Kiso M, Takahashi K, Sakai-Tagawa Y, Shinya K, Sakabe S, Le QM, et al.  
642 T-705 (favipiravir) activity against lethal H5N1 influenza A viruses. *Proc Natl*  
643 *Acad Sci U S A.* 2010;107(2):882–7.
- 644 44. Farhat N, Khan AU. Repurposing drug molecule against SARS-Cov-2  
645 (COVID-19) through molecular docking and dynamics: a quick approach to  
646 pick FDA-approved drugs. *J Mol Model [Internet].* 2021;27(11):1–11.  
647 Available from: <https://doi.org/10.1007/s00894-021-04923-w>
- 648 45. Liang J, Pitsillou E, Ververis K, Guallar V, Hung A, Karagiannis TC. Small  
649 molecule interactions with the SARS-CoV-2 main protease: In silico all-atom  
650 microsecond MD simulations, PELE Monte Carlo simulations, and  
651 determination of in vitro activity inhibition. *J Mol Graph Model.*  
652 2022;110(January):293.
- 653
- 654
